# Supplementary material for: Effect of asymmetric modification on perylene derivative molecule self-assembly structures
Source: Royal Society of Chemistry journal article supplement (doi:10.1039/c8nj04643c), 2019-01-01
Supplement: c8nj04643c1.pdf [file c8nj04643c1.pdf]

## Supporting information

### Influence of asymmetric modification on coronene and perylene derivative molecule self-assembly on HOPG

Xiaoping Liu <sup>a,†</sup>, Lingwei Xue <sup>d,†</sup>, Minghui Liang <sup>a</sup>, Keyan Tan <sup>c,\*</sup>, Ke Deng <sup>a,\*</sup>, Guanglu Ge <sup>a,\*</sup>,  
Peng Jiang <sup>a,b,\*</sup>

<sup>a</sup> CAS Key Laboratory of Standardization and Measurement for  
Nanotechnology, CAS Center for Excellence in Nanoscience, National Center for Nanoscience  
and Technology, Beijing 100190, P. R. China

<sup>b</sup> College of Chemistry and Chemical Engineering, University of Chinese Academy of Sciences,  
Beijing 100049, P. R. China

<sup>c</sup> Chinese Academy of Geological Sciences, National Research Center for Geoanalysis, Key  
Laboratory of Eco-geochemistry, Ministry of National Resources

<sup>d</sup> College of Materials and Science Engineering, Beijing University of Chemical Technology,  
Beijing 100029, P. R. China

\*Corresponding authors.

E-mail addresses: pjiang@nanoctr.cn, kdeng@nanoctr.cn, gegl@nanoctr.cn,  
tankeyan2017@163.com

#### **S1 Synthesis procedures**

##### **S 1.1 Synthesis of P-DAPPD**

A mixture of 2 (0.8 g, 2.3 mmol), N,N'-Dimethyl-1,3-propanediamine (1.0 g, 9.8 mmol), and imidazole (5.5 g) was stirred at 180°C under Ar gas for 4 h. After purification through silica gel column chromatography, compound P-DAPPD (0.93 g, 95 %) was obtained as a orange solid. 2.3.4.5 compounds were synthesized according to literature methods [1-4]. <sup>1</sup>H-NMR (300 MHz, CDCl<sub>3</sub>): δ = 1.99 (d, 2H), 2.33 ppm (s, 6H), 2.50 ppm (d, 2H), 3.79 ppm (d, 2H), 7.50 ppm (d, 2H), 7.74 ppm (d, 4H), 8.32 ppm (d, 2H), 8.45 ppm (d, 2H). ESI-MS: m/z =431.2 [M + H]<sup>+</sup>. <sup>13</sup>C NMR (300MHz, CDCl<sub>3</sub>, δ, ppm): 168.11, 130.12, 128.14, 125.73, 125.62, 124.81, 122.32, 122.02, 121.54, 120.81, 119.74, 55.62, 44.03, 34.55, 25.46. Calcd for C<sub>29</sub>H<sub>22</sub>N<sub>2</sub>O<sub>2</sub> 430.2,

found: 430.2.

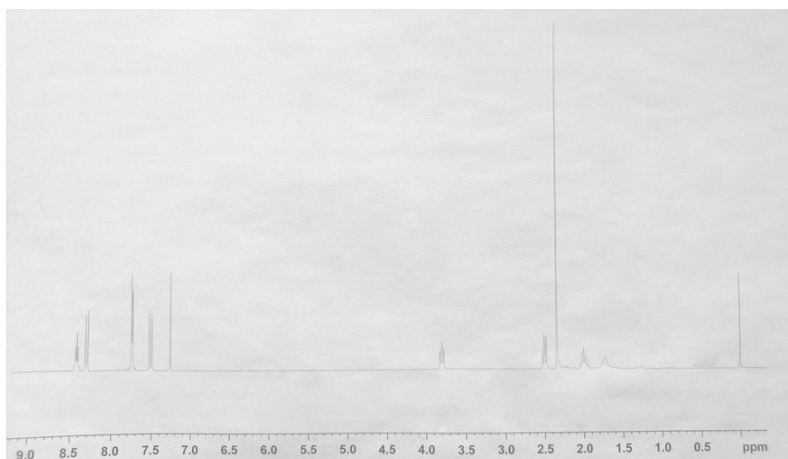

Figure S1.1.1 <sup>1</sup>H NMR of P-DAPPD

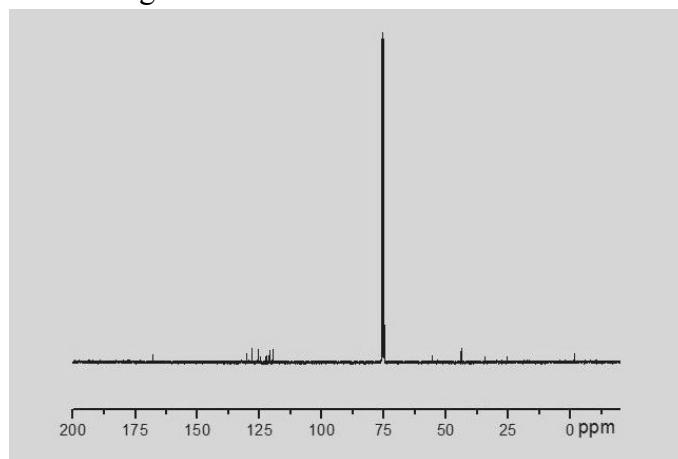

Figure S1.1.2 <sup>13</sup>C NMR of P-DAPPD

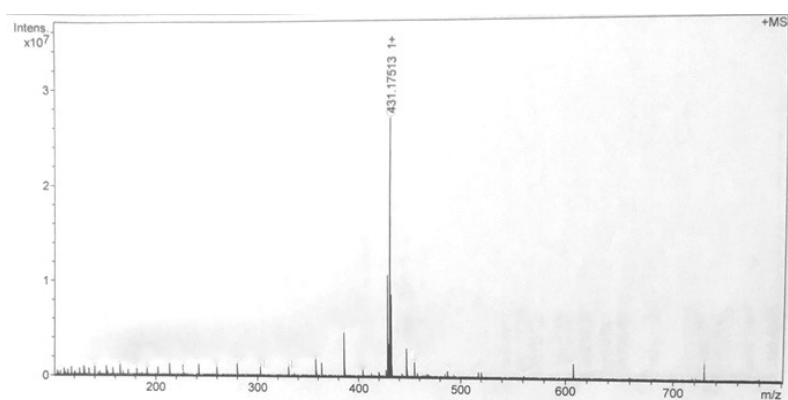

Figure S1.1.3 HR-MS of P-DAPPD

## S 1.2 Synthesis of CB-DAP

Compound CB-DAP was synthesized according to the compound P-DAPPD, which

was a orange solid. ESI-MS:  $m/z = 609.5 [M + H]^+$ .  $^1\text{H-NMR}$  (300 MHz,  $\text{CDCl}_3$ ):  $\delta = 2.11$  (d, 4H), 2.40 ppm (s, 12H), 2.58 ppm (t, 4H), 3.93 ppm (d, 4H), 7.64 ppm (d, 4H), 8.57 ppm (d, 4H).  $^{13}\text{C NMR}$  (300MHz,  $\text{CDCl}_3$ ,  $\delta$ , ppm): 169.74, 131.92, 129.63, 127.59, 124.02, 123.58, 122.73, 122.53, 121.14, 56.35, 44.52, 36.02, 26.14. Calcd for  $\text{C}_{38}\text{H}_{32}\text{N}_4\text{O}_4$ , 608.2, found: 608.5.

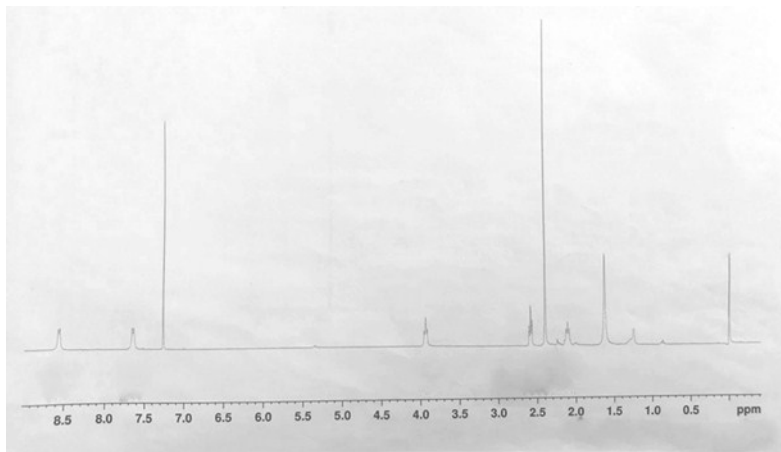

Figure S1.2.1  $^1\text{H NMR}$  of CB-DAP

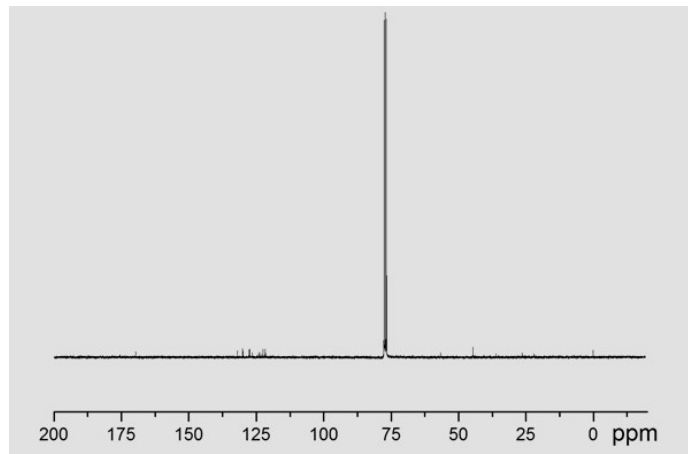

Figure S1.2.2  $^{13}\text{C NMR}$  of CB-DAP

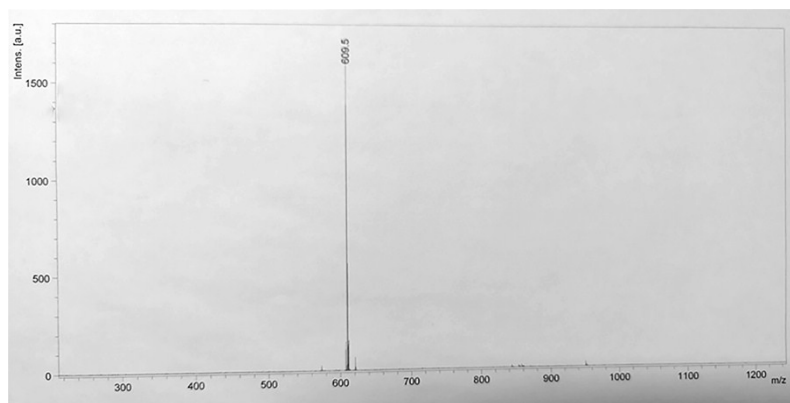

Figure S1.2.3 HR-MS of CB-DAP

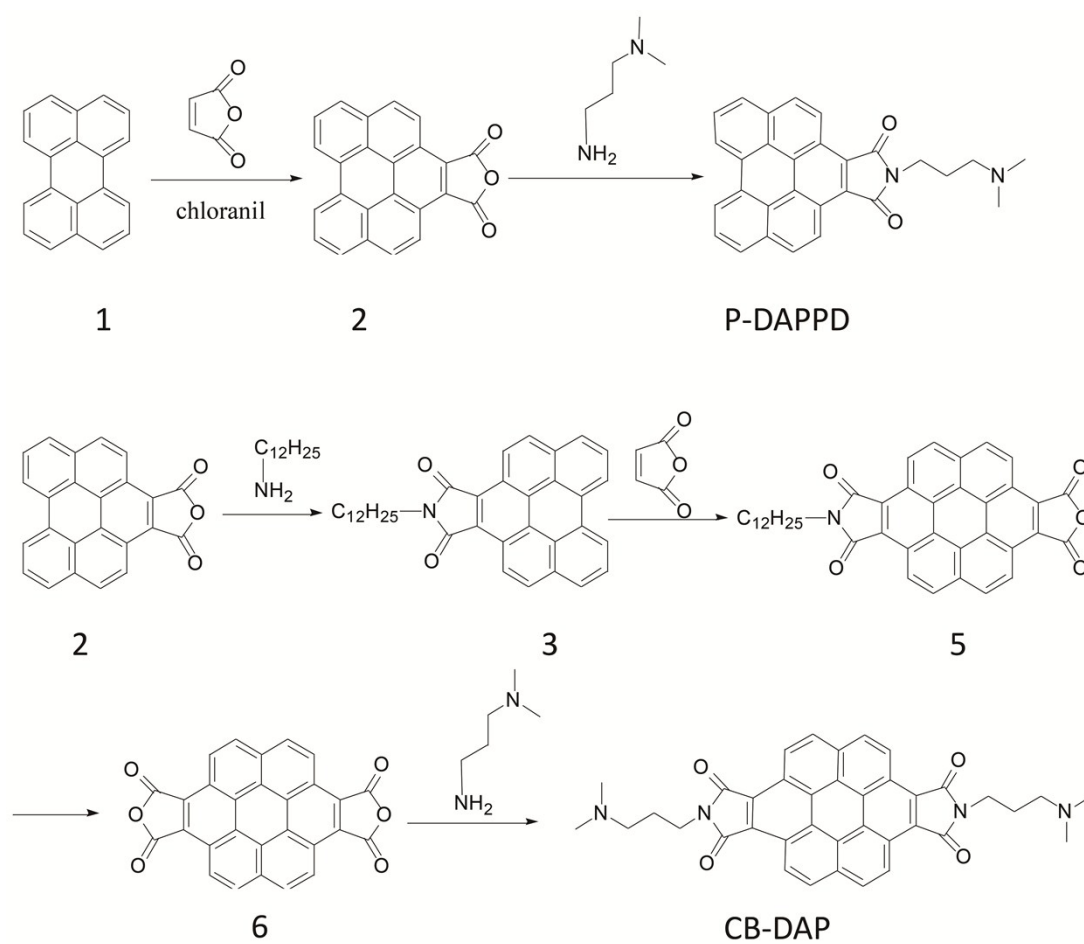

Scheme S1. The synthesis procedures of P-DAPPD and CB-DAP.

## S2 FT-IR spectra of P-DAPPD and CB-DAP.

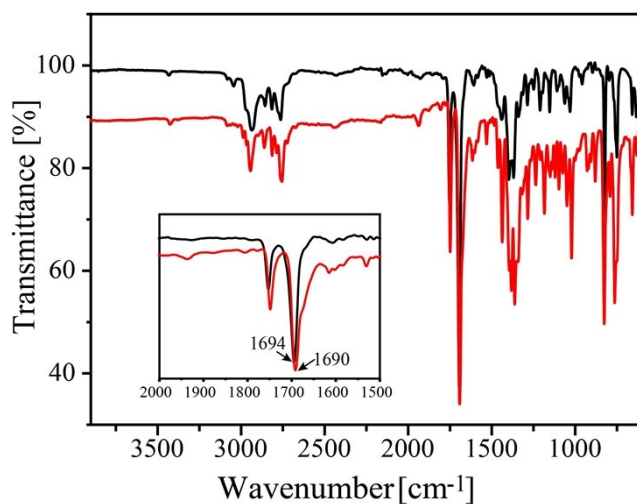

Figure S2.1 FT-IR spectra for P-DAPPD, black line for powder and red line for thin film.

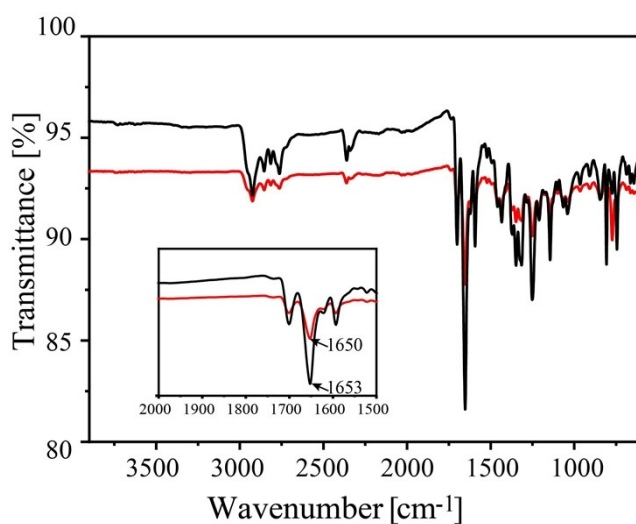

Figure S2.2 FT-IR spectra for CB-DAP: black line for powder and red line for thin film.

## Reference

- [1] Z.J. Chen, U. Baumeister, C. Tschierske, F. Wurthner, *Chem-Eur J*, 2007, 13, 450-465.
- [2] E. Clar, M. Zander, *J. Chem. Soc.*, 1957, 4616-4619.
- [3] S. Alibert-Fouet, I. Seguy, J.F. Bobo, P. Destruel, H. Bock, *Chemistry*, 2007, 13, 1746-1753.
- [4] Z.Y. Yuan, Y. Xiao, Y. Yang, T. Xiong, *Macromolecules*, 2011, 44, 1788-1791.
